# Supplementary material
Source: PubMed Central journal article supplement (PMC4516685)
Supplement: NIHMS693745-supplement.pdf [file NIHMS693745-supplement.pdf]

**Table 4. Correlations of NEI-VFQ-25 Scores with Symptoms and Clinical Parameters in patients with Ocular Graft- versus-host Disease after Adjustment for Age and Sex**

| <b>NEI-VFQ-25 Scales</b> | <b>OSDI</b> | <b>SANDE</b> | <b>CFS</b> | <b>TBUT</b> | <b>Schirmer</b> | <b>BCVA</b> |
|--------------------------|-------------|--------------|------------|-------------|-----------------|-------------|
| Composite score          | -0.8*       | -0.5*        | -0.3*      | 0.2         | -0.1            | -0.5*       |
| Ocular pain              | -0.7*       | -0.6*        | -0.2       | 0.2         | 0.1             | -0.3*       |
| VS Role difficulties     | -0.7*       | -0.4*        | -0.2       | 0.2         | -0.0            | -0.3*       |
| VS Mental function       | -0.8*       | -0.5*        | -0.4*      | 0.2         | 0.1             | -0.4*       |
| General vision           | -0.5*       | -0.2*        | -0.4*      | 0.2         | 0.1             | -0.4*       |
| Near activities          | -0.8*       | -0.5*        | -0.4*      | 0.1         | 0.1             | -0.4*       |
| Distance activities      | -0.7*       | -0.4*        | -0.4*      | 0.2         | -0.1            | -0.5*       |
| Driving                  | -0.5*       | -0.2*        | -0.2       | 0.1         | 0.0             | -0.4*       |
| VS Dependency            | -0.5*       | -0.4*        | -0.3*      | 0.1         | -0.2            | -0.5*       |
| Peripheral vision        | -0.4*       | -0.2         | -0.2       | 0.1         | -0.3*           | -0.2*       |
| VS Social function       | -0.5*       | -0.4*        | -0.1       | 0.1         | -0.2            | -0.5*       |
| Color vision             | -0.3*       | -0.2         | -0.1       | -0.1        | -0.3*           | -0.1        |
| General Health           | -0.2        | -0.2         | -0.1       | 0.1         | -0.1            | -0.2        |

NEI-VQ-25: 25-item National Eye Institute Visual Function Questionnaire; SANDE: Symptoms Assessment in Dry Eye; OSDI: Ocular Surface Disease Index; CFS: corneal fluorescein staining; TBUT: tear break-up time; BCVA: best-corrected visual acuity; VS: vision specific. Higher scores in the NEI-VFQ-25 indicate better quality of life (note the negative correlations with OSDI, SANDE, CFS, and BCVA). \*P<0.05
